# Supplementary material for: High expression level of CD44v8-10 in cancer stem-like cells is associated with poor prognosis in esophageal squamous cell carcinoma patients treated with chemoradiotherapy
Source: PubMed Central journal article supplement (PMC6201859; doi:10.18632/oncotarget.26172), 2018-10-09
Supplement: oncotarget-09-34876-s001.pdf [file oncotarget-09-34876-s001.pdf]

## High expression level of CD44v8-10 in cancer stem-like cells is associated with poor prognosis in esophageal squamous cell carcinoma patients treated with chemoradiotherapy

### SUPPLEMENTARY MATERIALS

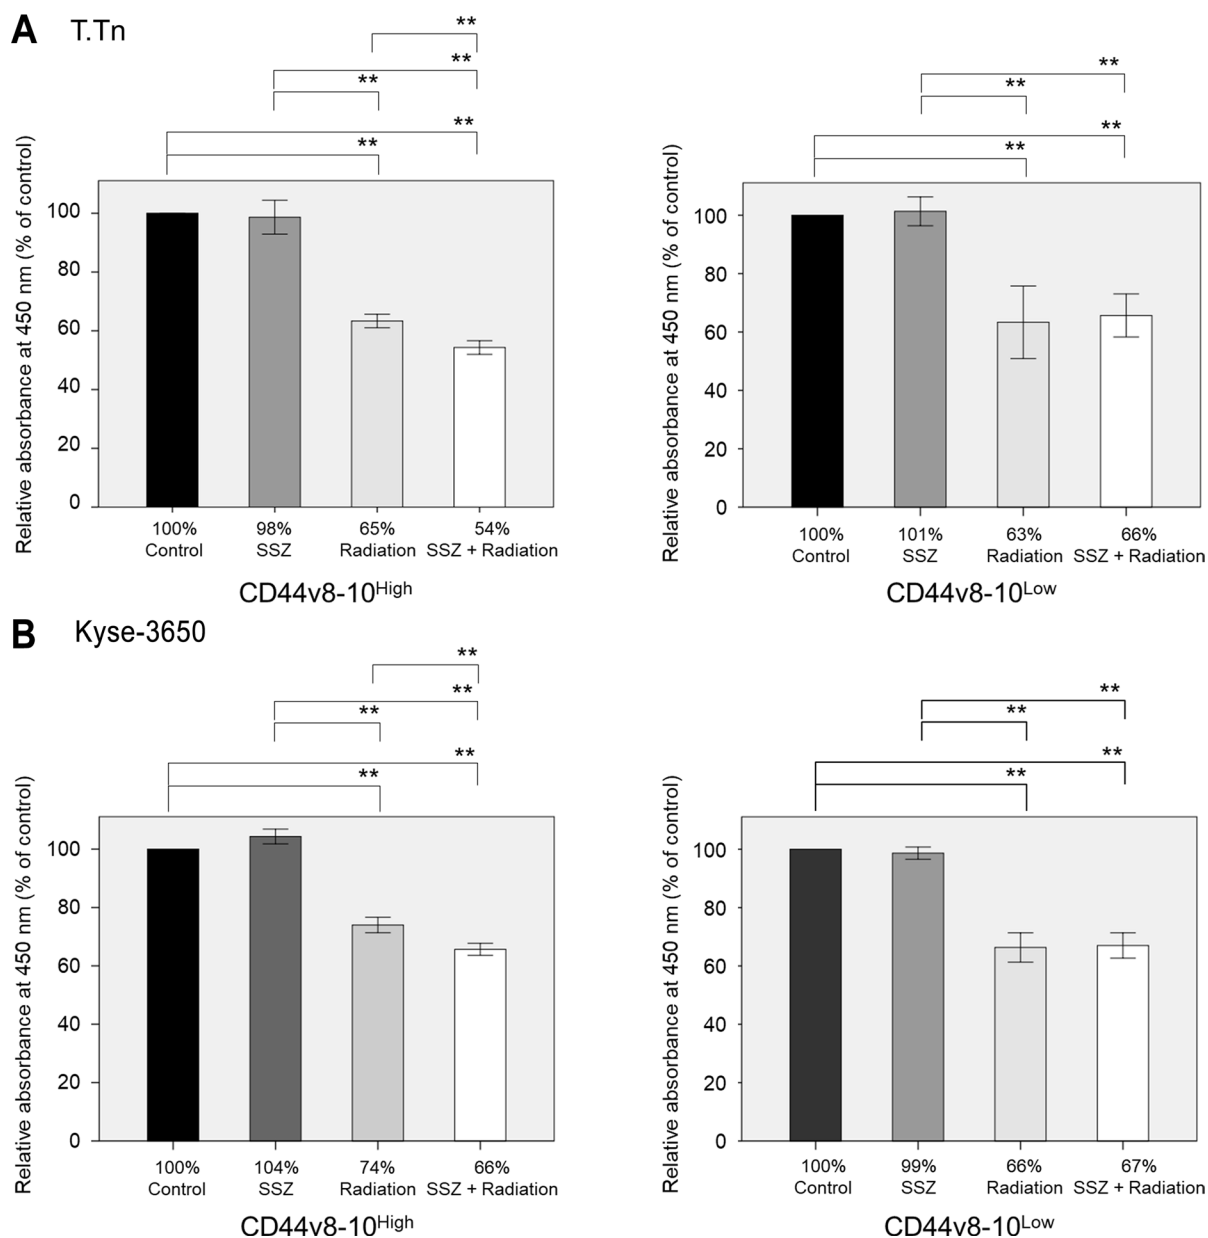

**Supplementary Figure 1: Effect of CD44v8-10 on radiation-induced cell death (WST assay).** (A) Quantitative analyses of cell viability were performed in high and low CD44v8-10-expressing T.Tn cells after treatment with SSZ (5  $\mu$ M), radiation (2 Gy), or SSZ + radiation using the WST assay. Under high ROS conditions due to radiation, SSZ significantly decreased cell proliferation in CD44v8-10<sup>High</sup> cells (65% vs. 54%,  $p = 0.001$ ). However, in CD44v8-10<sup>Low</sup> cells, there was no significant difference of cell proliferation between radiation alone and SSZ + radiation treatment groups (63% vs. 66%,  $p = 0.981$ ). (B) The same effect was observed for high and low CD44v8-10-expressing Kyse-3650 cells (74% vs. 66%,  $p = 0.006$  for CD44v8-10<sup>High</sup>; 66% vs. 67%,  $p = 0.995$  for CD44v8-10<sup>Low</sup>). Our data suggest that CD44v8-10 decreased radiation-induced cell death. All data indicate mean  $\pm$  SD. \*\* $p < 0.01$ ,  $N = 6$ , in triplicate. Abbreviations: SSZ, sulfasalazine; WST, water soluble tetrazolium salt-8.

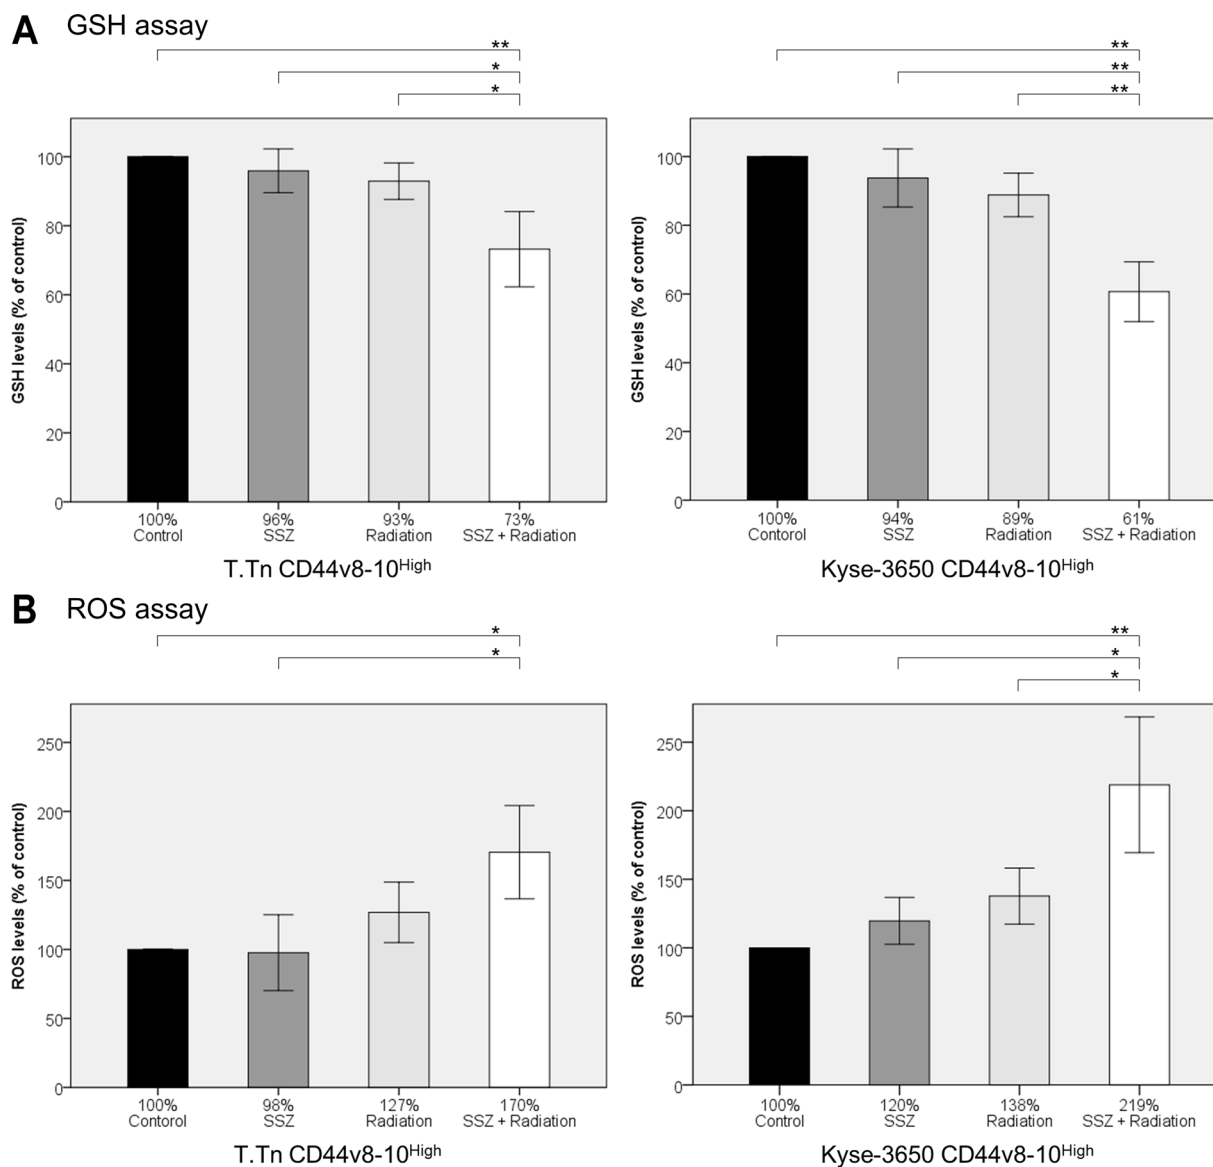

**Supplementary Figure 2: The effect of CD44v8-10 on cellular GSH and ROS levels.** (A) When radiation (2 Gy) was applied, SSZ (5  $\mu$ M) significantly decreased cellular GSH levels (93% for radiation vs. 73% for SSZ + radiation,  $p = 0.032$  for T.Tn; 89% vs. 61%,  $p = 0.004$  for Kyse-3650). That is, CD44v8-10 significantly decreased cellular GSH. (B) When radiation was applied, SSZ increased cellular ROS levels (127% vs. 170%,  $p = 0.205$  for T.Tn; 138% vs. 219%  $p = 0.032$  for Kyse-3650). CD44v8-10 may enhance the cellular ROS defense ability by increasing GSH levels via CD44v8-10-xCT-GSH axis. All data indicate mean  $\pm$  SD. \* $p < 0.05$ , \*\* $p < 0.01$ .  $N = 2$ , in triplicate for GSH assay.  $N = 3$ , in triplicate for ROS assay. Abbreviations: SSZ, sulfasalazine; GSH, glutathione-SH; ROS, reactive oxygen species.

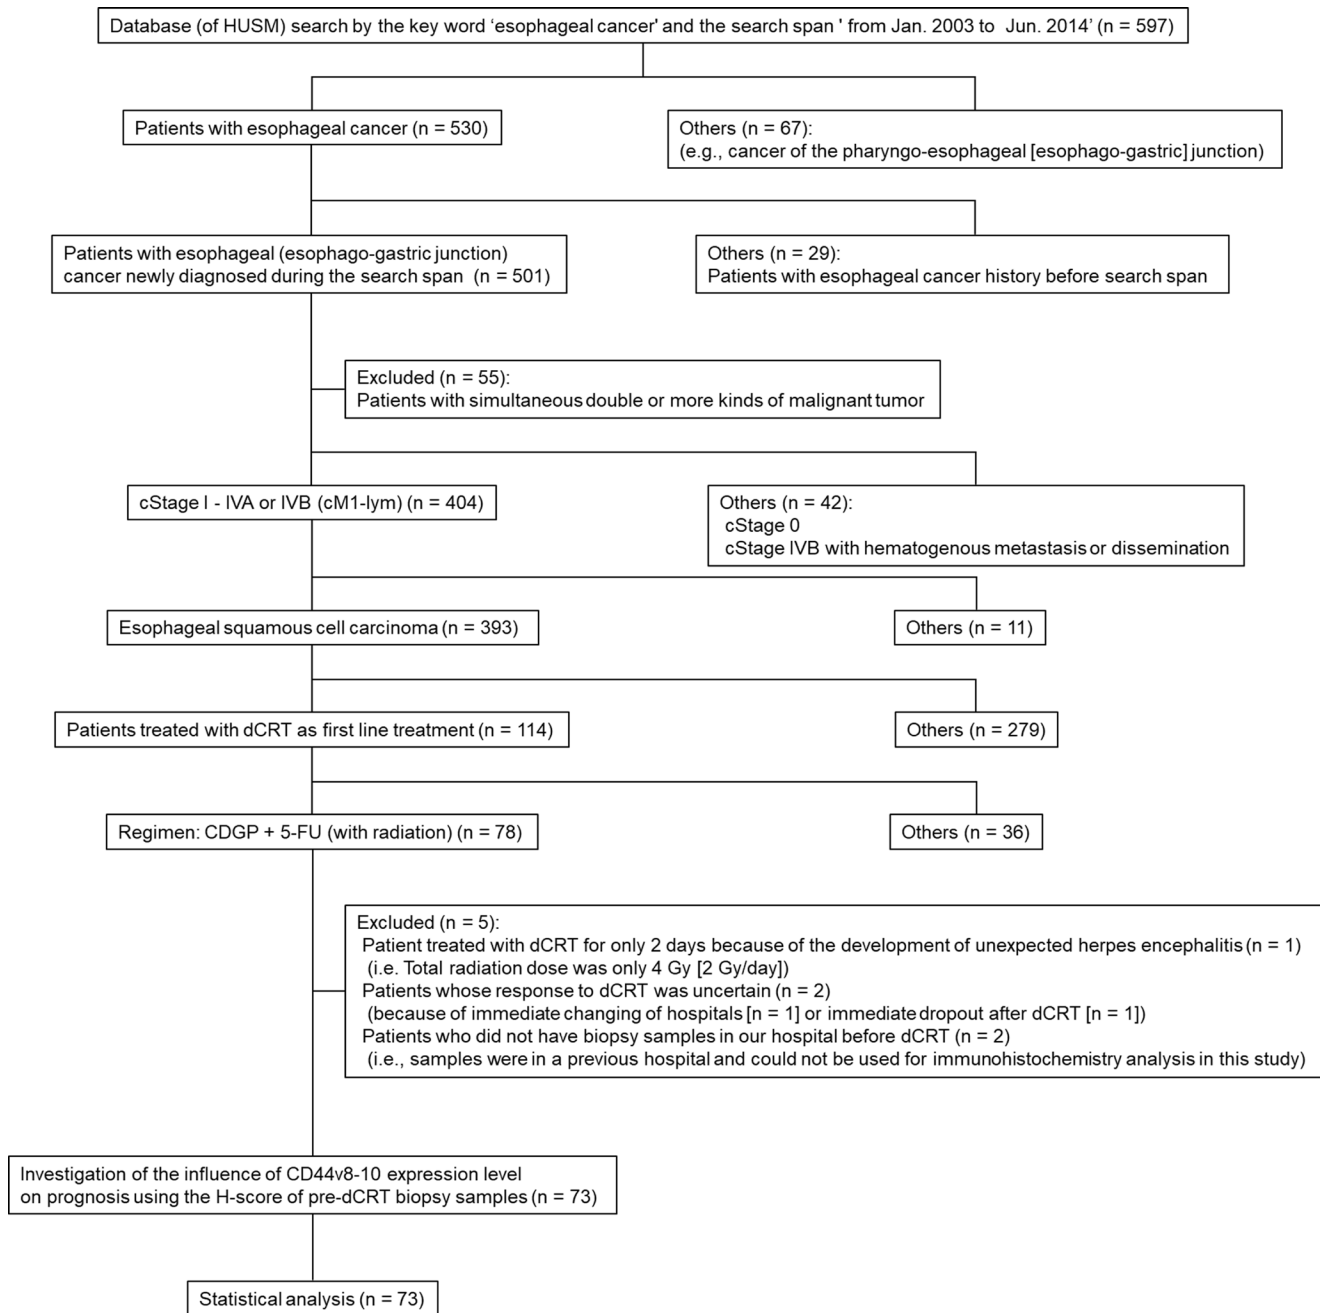

**Supplementary Figure 3: Participant flow.** Participant flow through the study is shown. Abbreviations: HUSM, Hamamatsu University school of Medicine; cStage, clinical stage in Union for International Cancer Control 8th edition; cM1-lym, distant lymph node metastasis; dCRT, definitive chemoradiotherapy; CDGP, nedaplatin; 5-FU, 5-fluorouracil; H-score, histo-score; CD44v8-10, CD44 isoform containing variant exon 8 to 10.

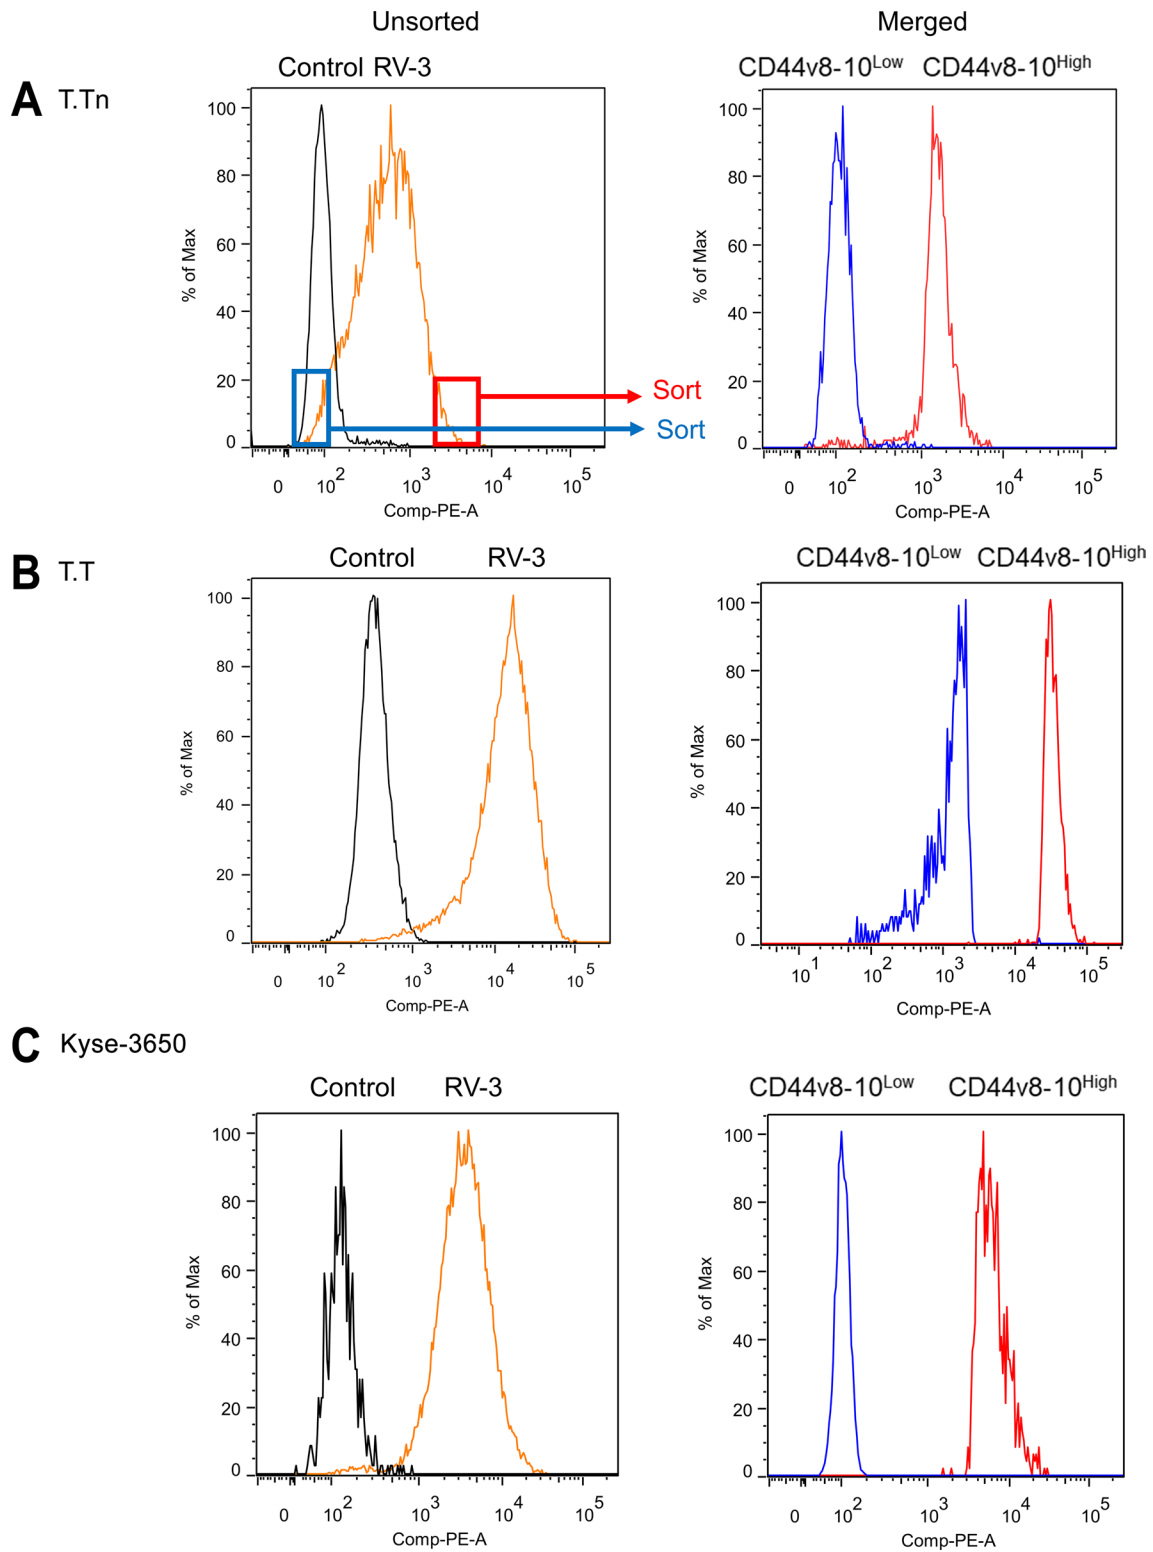

**Supplementary Figure 4: Flow cytometry cell sorting of CD44v8-10<sup>High</sup> and CD44v8-10<sup>Low</sup> cells.** (A–C) We obtained subpopulations of CD44v8-10<sup>High</sup> and CD44v8-10<sup>Low</sup> cells aseptically from three parent E-SCC cell lines (T.Tn, T.T, and Kyse-3650). These CD44v8-10<sup>High</sup> and CD44v8-10<sup>Low</sup> cells were subcultured separately and cryopreserved for use in the study. Abbreviations: RV-3, anti-CD44v8-10 antibody.

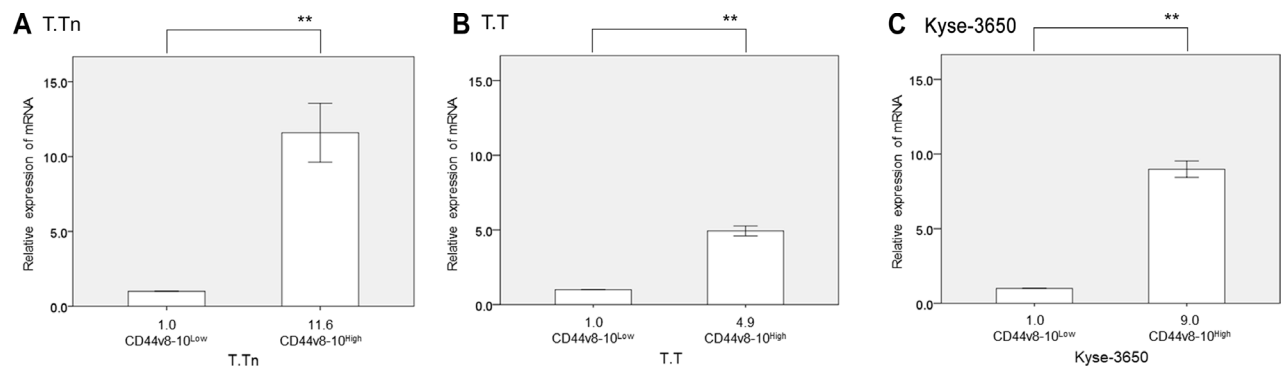

**Supplementary Figure 5: CD44v8-10 mRNA level after scale-up.** (A-C) CD44v8-10 mRNA level in CD44v8-10<sup>High</sup> subpopulations was higher than that in CD44v8-10<sup>Low</sup> subpopulations (11.6vs1.0,  $p < 0.001$  for T.Tn; 4.9vs1.0,  $p < 0.001$  for T.T; and 9.0vs1.0  $p < 0.001$  for Kyse-3650, respectively). CD44v8-10<sup>High</sup>/CD44v8-10<sup>Low</sup> ratio was calculated by delta-delta Ct method. All data indicate mean  $\pm$  SD. \*\* $p < 0.01$ ,  $N = 3$ , in triplicate.

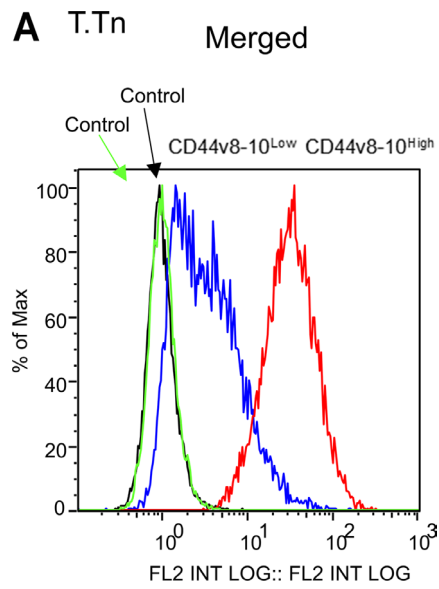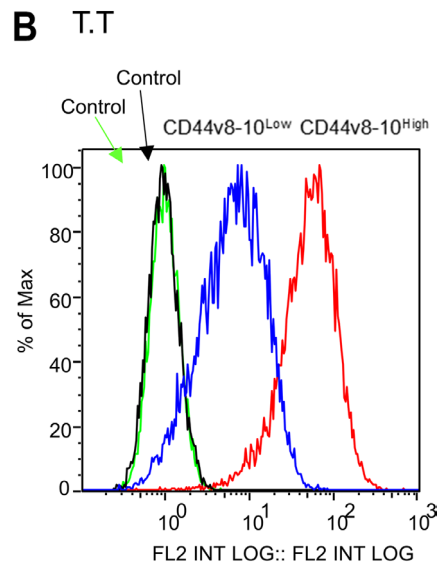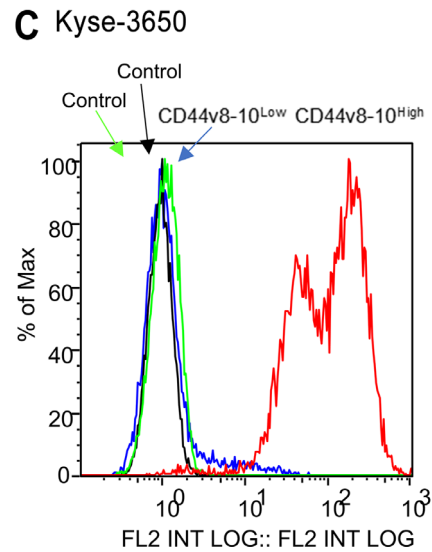

**Supplementary Figure 6: CD44v8-10 protein expression level and cell number distribution after scale-up.** (A–C) CD44v8-10<sup>High</sup> and CD44v8-10<sup>Low</sup> cells of each cell line after scale-up maintained similar CD44v8-10 protein levels and cell number distribution to those immediately after cell sorting.

**A**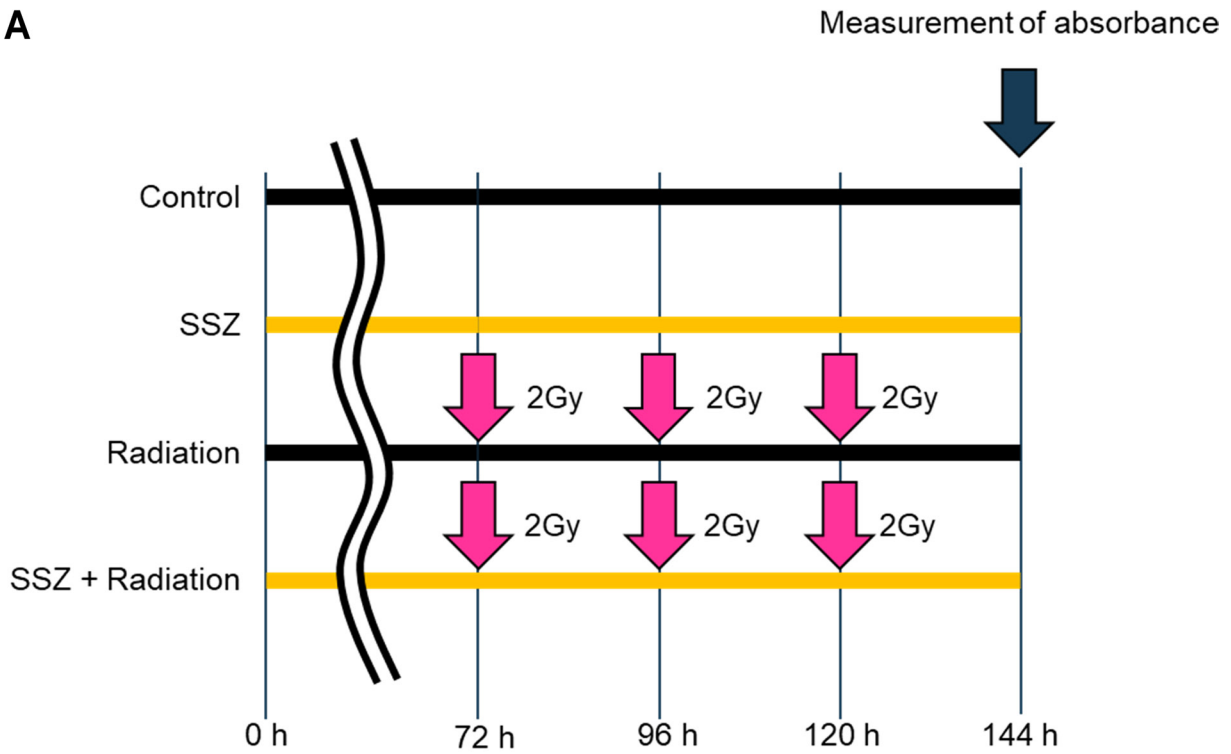**B**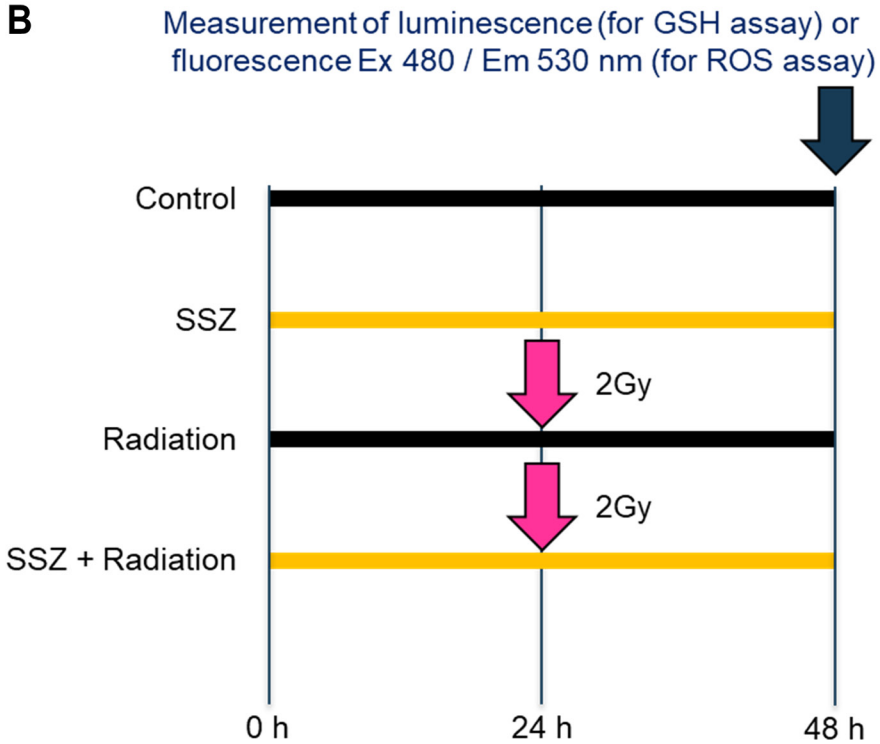

**Supplementary Figure 7: Schematic of assay protocols.** (A) In WST assay, cell proliferation was determined after 144 hours for four groups: control, SSZ, radiation alone, and SSZ+radiation. (B) In GSH and ROS assay, cellular GSH and ROS levels were determined after 48 hours for the four groups. Abbreviations: SSZ, sulfasalazine., Ex/Em, excitation/emission wavelength.

## Supplementary Table 1: Search criteria for subjects and key inclusion/exclusion criteria

### Search criteria of subjects

Age  $\geq$  18 years old  
Gender: male and female  
Key word: esophageal cancer  
Search span: from Jan. 2003 to Jun. 2014

### Key inclusion criteria

Patients with esophageal cancer newly diagnosed during the search span  
Pathology: esophageal squamous cell carcinoma  
cStage: I - IVA or IVB (cM1-lym)  
Patients treated with dCRT for the 1st line treatment  
Regimen: CDGP + 5FU (with radiation)

### Key exclusion criteria

Patients with simultaneous double or more kinds of malignant tumor  
Total radiation dose in dCRT  $<$  10 Gy  
Patients whose response to dCRT was uncertain  
Patients whose biopsy samples before dCRT did not exist in our hospital

Abbreviations: cStage, clinical stage in Union for International Cancer Control 8th edition; cM1-lym, distant lymph node metastasis; 5-FU, 5-fluorouracil; CDGP, nedaplatin; dCRT, definitive chemoradiotherapy.
